# Supplementary material for: Facile synthesis of morphology-controlled hybrid structure of ZnCo2O4 nanosheets and nanowires for high-performance asymmetric supercapacitors
Source: Royal Society of Chemistry journal article supplement (doi:10.1039/d3ra07128f), 2024-01-01
Supplement: d3ra07128f1.pdf [file d3ra07128f1.pdf]

## Supporting Information

### Facile synthesis of morphology-controlled hybrid structure of $\text{ZnCo}_2\text{O}_4$ nanosheets and nanowires for high-performance asymmetric supercapacitors

Huiqing Fan,<sup>a,\*</sup> Hexiang Di,<sup>a</sup> Yanlei Bi,<sup>a</sup> Ru Wang,<sup>a</sup> Guangwu Wen,<sup>b</sup> Lu-Chang Qin<sup>c</sup>

<sup>a</sup> School of Chemistry and Chemical Engineering, Shandong University of Technology, Zibo, China

<sup>b</sup> School of Materials Science and Engineering, Shandong University of Technology, Zibo, China

<sup>c</sup> Department of Physics and Astronomy, University of North Carolina at Chapel Hill, Chapel Hill, NC 27599-3255, USA

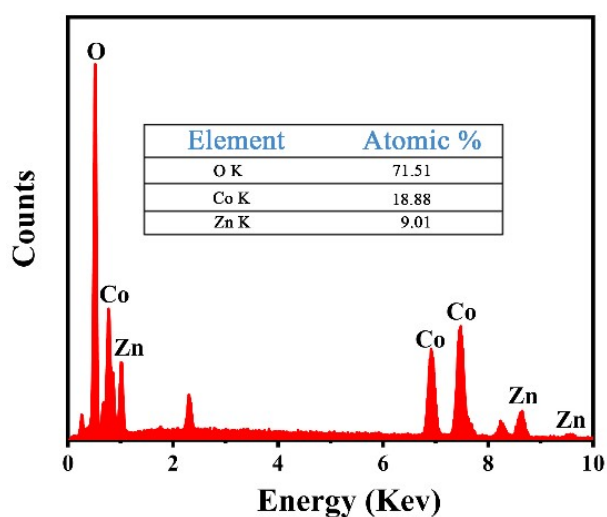

Fig. S1. EDS of the 3D hierarchical  $\text{ZnCo}_2\text{O}_4$  nanosheets@nanowires films.

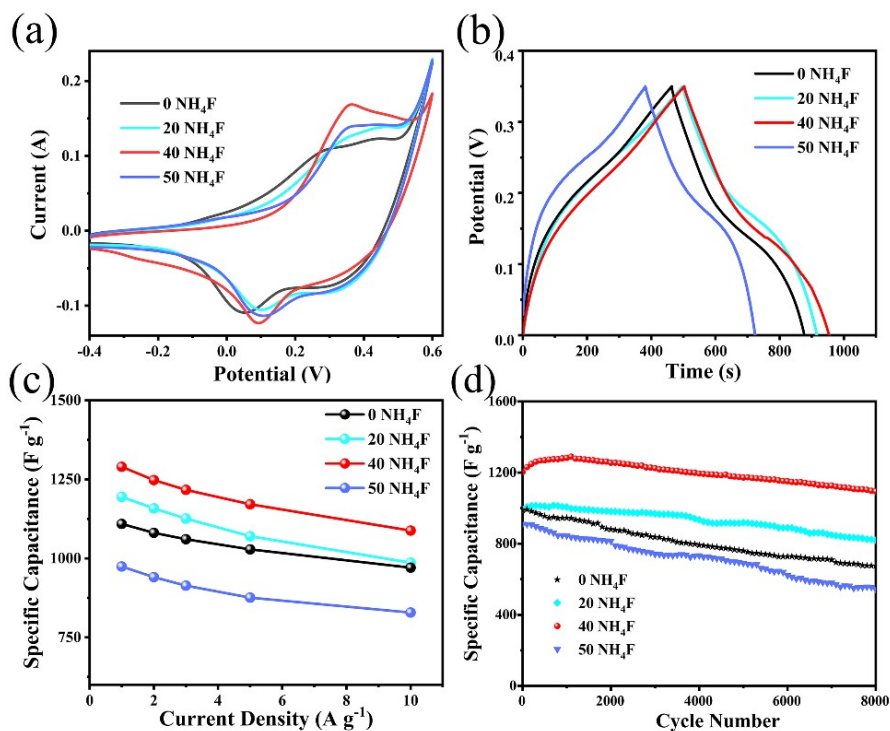

Fig. S2. Electrochemical properties of ZnCo<sub>2</sub>O<sub>4</sub> films electrodes obtained at different concentration of NH<sub>4</sub>F. (a) CV curves at the scan rate of 20 mV s<sup>-1</sup>. (b) Galvanostatic charge-discharge curves at current density of 1 A g<sup>-1</sup>. (c) Specific capacitances at different current densities. (d) Cycling stability at 1 A g<sup>-1</sup>.

Table S1 Parameters obtained by fitting of Nyquist plots in Fig. 7f.

| Sample               | R <sub>s</sub> (Ω) | R <sub>ct</sub> (Ω) | Z <sub>w</sub> (Ω) | CPE (μF cm <sup>-2</sup> ) |
|----------------------|--------------------|---------------------|--------------------|----------------------------|
| Before 10,000 cycles | 0.49               | 0.29                | 0.51               | 0.02                       |
| After 10,000 cycles  | 0.51               | 1.92                | 2.06               | 0.03                       |

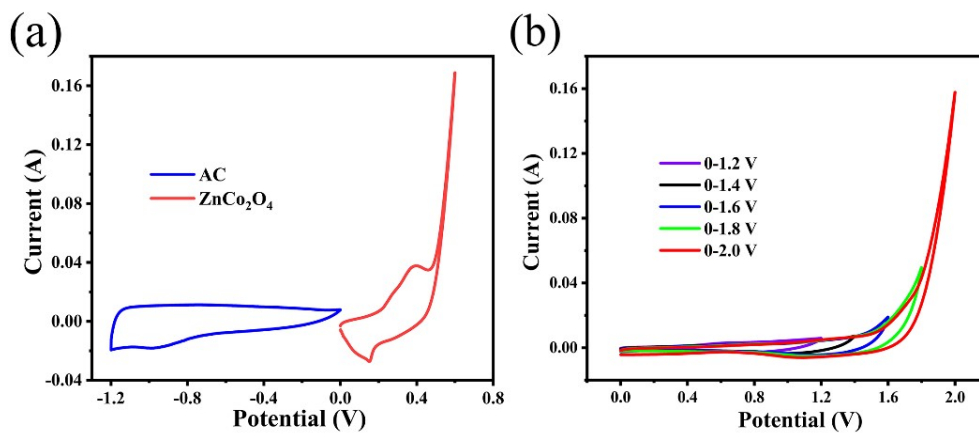

Fig. S3. (a) CV curves of the 3D hierarchical  $\text{ZnCo}_2\text{O}_4$  nanosheets@nanowires films and AC electrodes at the scan rate of  $20 \text{ mV s}^{-1}$ . (b) CV curves of  $\text{ZnCo}_2\text{O}_4//\text{AC}$  ASC device in different potential ranges.

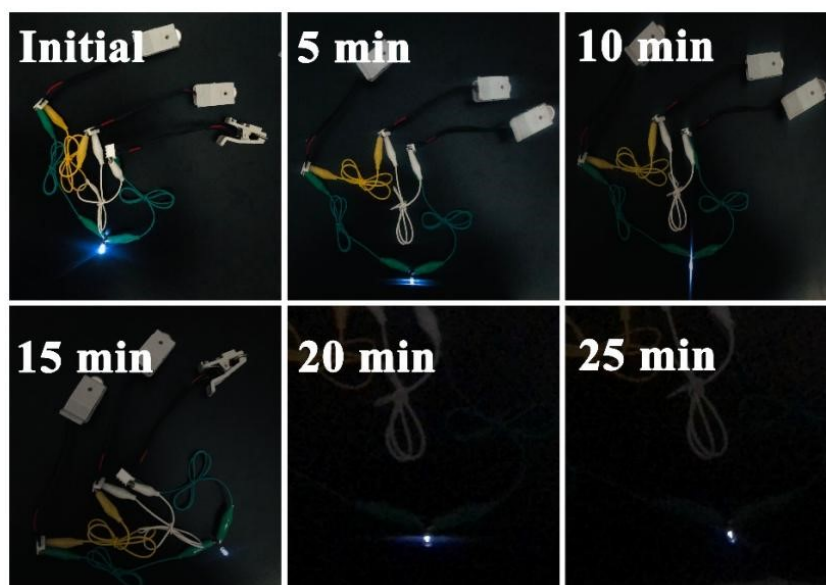

Fig. S4. Optical images of a blue LED powered by three ASC devices connected in series and the lightened blue LED at different stages.

Table S2 Comparison of the electrochemical properties between the as-prepared 3D hierarchical ZnCo<sub>2</sub>O<sub>4</sub> nanosheets@nanowires films and recent results reported in literature.

| Materials                                                           | Electrolyte | Voltage window | Specific Capacity                                   | Cycling Stability                                | Ref. |
|---------------------------------------------------------------------|-------------|----------------|-----------------------------------------------------|--------------------------------------------------|------|
| ZnCo <sub>2</sub> O <sub>4</sub> nanoparticles                      | 1 M KOH     | 0-0.45 V       | 843 F g <sup>-1</sup> at 1 A g <sup>-1</sup>        | 91.5% after 2,000 cycles at 1 A g <sup>-1</sup>  | [1]  |
| 3D hierarchical ZnCo <sub>2</sub> O <sub>4</sub>                    | 6 M KOH     | 0-0.4 V        | 421.05 F g <sup>-1</sup> at 1 A g <sup>-1</sup>     | 88% after 5000 cycles at 5 A g <sup>-1</sup>     | [2]  |
| ZnCo <sub>2</sub> O <sub>4</sub> nanobelts                          | 2 M KOH     | 0-0.45 V       | 776.2 F g <sup>-1</sup> at 1 A g <sup>-1</sup>      | 84.3% after 1,500 cycles at 3 A g <sup>-1</sup>  | [3]  |
| ZnCo <sub>2</sub> O <sub>4</sub> nanowires                          | 2 M KOH     | 0-0.4 V        | 1099 F g <sup>-1</sup> at 1 A g <sup>-1</sup>       | 84.8% after 5,000 cycles at 40 A g <sup>-1</sup> | [4]  |
| ZnCo <sub>2</sub> O <sub>4</sub> microspheres                       | 1 M KOH     | 0-0.425 V      | 344.44 F g <sup>-1</sup> at 1 mA cm <sup>-2</sup>   | 85% after 500 cycles at 100 mV s <sup>-1</sup>   | [5]  |
| peony-like ZnCo <sub>2</sub> O <sub>4</sub>                         | 3 M KOH     | 0-0.55 V       | 440 F g <sup>-1</sup> at 1 A g <sup>-1</sup>        | 98% after 5,000 cycles at 2 A g <sup>-1</sup>    | [6]  |
| ZnCo <sub>2</sub> O <sub>4</sub> with Zn/Co vacancies               | 6 M KOH     | 0-0.4 V        | 1608.95 F g <sup>-1</sup> at 0.35 A g <sup>-1</sup> | 89% after 3,500 cycles at 5 A g <sup>-1</sup>    | [7]  |
| flower-like ZnCo <sub>2</sub> O <sub>4</sub>                        | KOH         | 0-0.4 V        | 680 F g <sup>-1</sup> at 1 A g <sup>-1</sup>        | 90% after 2,000 cycles at 5 A g <sup>-1</sup>    | [8]  |
| Porous ZnCo <sub>2</sub> O <sub>4</sub> quasi-cubes                 | 2 M KOH     | 0-0.45 V       | 804 F g <sup>-1</sup> at 1 A g <sup>-1</sup>        | 79.2% after 3,000 cycles at 5 A g <sup>-1</sup>  | [9]  |
| ZnCo <sub>2</sub> O <sub>4</sub> nanocubes with 3D porous structure | 6 M KOH     | 0-0.5 V        | 542.6 F g <sup>-1</sup> at 1 A g <sup>-1</sup>      | 87% after 8,000 cycles at 15 A g <sup>-1</sup>   | [10] |

|                                                                             |         |          |                                                    |                                                          |                |
|-----------------------------------------------------------------------------|---------|----------|----------------------------------------------------|----------------------------------------------------------|----------------|
| N-rGO/ZnCo <sub>2</sub> O <sub>4</sub>                                      | 1 M KOH | 0-0.6 V  | 950 F g <sup>-1</sup> at<br>1 A g <sup>-1</sup>    | 89.6% after<br>5,000 cycles at<br>1 A g <sup>-1</sup>    | [11]           |
| flower-like<br>ZnCo <sub>2</sub> O <sub>4</sub> /ZnO                        | 6 M KOH | 0-0.5 V  | 803 F g <sup>-1</sup> at<br>1 A g <sup>-1</sup>    | 91.04% after<br>10,000 cycles at<br>10 A g <sup>-1</sup> | [12]           |
| 3D hierarchical<br>ZnCo <sub>2</sub> O <sub>4</sub><br>nanosheets@nanowires | 6 M KOH | 0-0.35 V | 1289.6 F g <sup>-1</sup><br>at 1 A g <sup>-1</sup> | 86.8% after<br>10,000 cycles at<br>1 A g <sup>-1</sup>   | (This<br>work) |

## References

- [1] J. Bhagwan, S. Khaja Hussain and J. S. Yu, *J. Alloys Compd.*, 2020, **815**, 152456.
- [2] G. Rajasekhara Reddy, N. Siva Kumar, B. Deva Prasad Raju, G. Shanmugam, E. H. Al-Ghurabi and M. Asif, *Nanomaterials*, 2020, **10**, 1206.
- [3] L. Xu, Y. Zhao, J. Lian, Y. Xu, J. Bao, J. Qiu, L. Xu, H. Xu, M. Hua and H. Li, *Energy*, 2017, **123**, 296-304.
- [4] J. A. Rajesh and K. -S. Ahn, *Catalysts*, 2021, **11**, 1516-1530.
- [5] N. Tiwari, S. Kadam, A. Kakade, R. Ingole and S. Kulkarni, *ECS J. Solid State Sci. Technol.*, 2021, **10**, 103008.
- [6] Y. Shang, T. Xie, Y. Gai, L. Su, L. Gong, H. Lv and F. Dong, *Electrochim. Acta*, 2017, **253**, 281-290.
- [7] G. R. Reddy, G. Dillip, T. Sreekanth, R. Rajavaram, B. D. P. Raju, P. Nagajyothi and J. Shim, *Appl. Surf. Sci.*, 2020, **529**, 147123.
- [8] R. R. Gutturu, T. V. M. Sreekanth, R. Rajavaram, D. P. R. Borelli, G. R. Dillip, P. C. Nagajyothi and J. Shim, *Int. J. Energy Res.*, 2020, **44**, 11233-11247.
- [9] H. Chen, X. Du, J. Sun, H. Mao, R. Wu and C. Xu, *Appl. Surf. Sci.*, 2020, **515**, 146008.
- [10] C. Kuchi, N. G. Prakash, K. Prasad, Y. V. M. Reddy, B. Sravani, R. Mangiri and G. R. Reddy, *Mater. Sci. Semicond. Process.*, 2022, **142**, 106453.
- [11] G. Vignesh, R. Ranjithkumar, P. Devendran, N. Nallamuthu, S. Sudhahar and M.

Krishna Kumar, *Mater. Sci. Eng. B*, 2023, **290**, 116328.

[12] P. Sivakumar, L. Kulandaivel, J. W. Park, C. Justin Raj, R. Manikandan and H. Jung, *J. Alloys Compd.*, 2023, **952**, 170042.
